# Supplementary material for: Molecular design of organic small molecules based on diindole–diimide with fused aromatic heterocycles as donors for organic solar cells
Source: Royal Society of Chemistry journal article supplement (doi:10.1039/c7ra07017a), 2017-01-01
Supplement: c7ra07017a1.pdf [file c7ra07017a1.pdf]

*RSC Advances*

## **Molecular design of organic small molecules based on indolo[7,6-g]indole-diimide with fused aromatic heterocycles as donors for organic solar cells**

Ruifa Jin<sup>a,b,\*</sup>, Ahmad Irfan<sup>c,d</sup>

<sup>a</sup>*Inner Mongolia Key Laboratory of Photoelectric Functional Materials, Chifeng 024000, P. R. China*

<sup>b</sup>*College of Chemistry and Chemical Engineering, Chifeng University, Chifeng 024000, P. R. China*

<sup>c</sup>*Research Center for Advanced Materials Science, King Khalid University, Abha 61413, P.O. Box 9004, Saudi Arabia*

<sup>d</sup>*Department of Chemistry, Faculty of Science, King Khalid University, Abha 61413, P.O. Box 9004, Saudi Arabia*

### **Index**

**Table SI** Calculated the longest wavelength of absorption  $\lambda_{\max}$  and corresponding oscillator strength  $f$  of molecule **1** by various methods with 6-31G(d,p) basis set, along with available experimental data.

**Table SII** The  $\lambda_{\text{abs}}$  and corresponding oscillator strength  $f$  (in parenthesis) and absorption region  $R$  of the first fifteen excited states for **1–6** obtained by the TD-B3LYP/6-31G(d,p) level.

**Table SIII** The calculated total energies and crystal cell parameters of **5** in different space groups.

**Table SIV** The calculated total energies and crystal cell parameters of **6** in different space groups.

**Figure SI** Herringbone Structures of **5** in  $P2_1$  space group and **6** in  $Pbcn$  space group.

**Table S1**

Calculated the longest wavelength of absorption  $\lambda_{\max}$  and corresponding oscillator strength  $f$  of molecule **1** by various methods with 6-31G(d,p) basis set, along with available experimental data.

| Methods                                       | $\lambda_{\max}$ | $f$   |
|-----------------------------------------------|------------------|-------|
| TD-B3LYP/6-31G(d,p)//B3LYP//6-31G(d,p)        | 542              | 0.127 |
| TD-PBE0/6-31G(d,p)//PBE0/6-31G(d,p)           | 514              | 0.138 |
| TD-CAM-B3LYP/6-31G(d,p)//CAM-B3LYP/6-31G(d,p) | 441              | 0.167 |
| TD-wB97XD/6-31G(d,p)//wB97XD/6-31G(d,p)       | 435              | 0.168 |
| TD-M062X /6-31G(d,p)//M062X /6-31G(d,p)       | 433              | 0.178 |
| TD- LCWPBE/6-31G(d,p)//LCWPBE/6-31G(d,p)      | 388              | 0.192 |
| Exp <sup>a</sup>                              | 540              |       |

<sup>a</sup> Experimental data for molecule **1** were taken from ref. [13]

**Table SII**

The  $\lambda_{\text{abs}}$  and corresponding oscillator strength  $f$  (in parenthesis) and absorption region  $R$  of the first fifteen excited states for **1–6** obtained by the TD-B3LYP/6-31G(d,p) level.

| Species         | <b>1</b>   | <b>2</b>   | <b>3</b>   | <b>4</b>   | <b>5</b>        | <b>6</b>   |
|-----------------|------------|------------|------------|------------|-----------------|------------|
| S <sub>1</sub>  | 542(0.127) | 473(0.084) | 559(0.088) | 595(0.175) | 565(0.188)      | 708(0.195) |
| S <sub>2</sub>  | 478(0.049) | 430(0.015) | 515(0.095) | 520(0.077) | 480(0.042)      | 614(0.0)   |
| S <sub>3</sub>  | 445(0.0)   | 395(0.0)   | 468(0.0)   | 497(0.0)   | 472(0.0)        | 550(0.0)   |
| S <sub>4</sub>  | 441(0.0)   | 388(0.00)  | 429(0.0)   | 484(0.0)   | 455(0.0)        | 535(0.113) |
| S <sub>5</sub>  | 380(0.0)   | 384(0.0)   | 411(0.0)   | 435(0.0)   | 393(0.057)      | 479(0.063) |
| S <sub>6</sub>  | 372(0.028) | 372(0.0)   | 369(0.018) | 423(0.0)   | 389(0.0)        | 478(0.0)   |
| S <sub>7</sub>  | 367(0.0)   | 371(0.210) | 366(0.0)   | 415(0.092) | 380(0.0)        | 430(0.131) |
| S <sub>8</sub>  | 355(0.083) | 352(0.0)   | 351(0.016) | 406(0.090) | 375(0.054)      | 423(0.020) |
| S <sub>9</sub>  | 339(0.321) | 349(0.004) | 334(0.0)   | 375(0.029) | 365(0.239)      | 405(0.0)   |
| S <sub>10</sub> | 334(0.001) | 346(0.0)   | 333(0.00)  | 367(0.153) | 341(0.0)        | 378(0.0)   |
| S <sub>11</sub> | 333(0.0)   | 345(0.0)   | 321(0.211) | 356(0.0)   | 335(0.010)      | 364(0.067) |
| S <sub>12</sub> | 318(0.283) | 338(0.001) | 310(0.0)   | 353(1.265) | 334(0.0)        | 360(0.0)   |
| S <sub>13</sub> | 315(0.0)   | 333(0.808) | 308(0.550) | 346(0.0)   | 334(1.001)      | 354(0.0)   |
| S <sub>14</sub> | 308(0.0)   | 321(0.0)   | 300(0.229) | 335(0.000) | 321 (0.0)       | 352(0.123) |
| S <sub>15</sub> | 306(0.291) | 312(0.042) | 295(0.0)   | 334(0.0)   | 321 (0.110<br>) | 346(1.251) |
| $R$             | 236        | 140        | 259        | 242        | 244             | 362        |

**Table SIII**The calculated total energies and crystal cell parameters of **5** in different space groups.

| Space groups                                    | Total energies | a (Å) | b (Å) | c (Å) | $\alpha$ (deg) | $\beta$ (deg) | $\gamma$ (deg) |
|-------------------------------------------------|----------------|-------|-------|-------|----------------|---------------|----------------|
| <i>C2</i>                                       | 612.79487788   | 61.80 | 6.26  | 59.87 | 90.0           | 162.5         | 90.0           |
| <i>C2/c</i>                                     | 633.49840288   | 42.90 | 36.68 | 28.86 | 90.0           | 144.8         | 90.0           |
| <i>Cc</i>                                       | 630.51867650   | 8.68  | 57.72 | 18.19 | 90.0           | 100.5         | 90.0           |
| <i>P2<sub>1</sub></i>                           | 606.24905143   | 33.23 | 25.12 | 4.81  | 90.0           | 114.0         | 90.0           |
| <i>P2<sub>1</sub>/c</i>                         | 632.00029706   | 16.74 | 18.68 | 39.16 | 90.0           | 117.5         | 90.0           |
| <i>P2<sub>1</sub>2<sub>1</sub>2<sub>1</sub></i> | 630.90048464   | 12.27 | 32.61 | 31.34 | 90.0           | 90.0          | 90.0           |
| <i>P<math>\bar{1}</math></i>                    | 616.90495361   | 35.34 | 6.74  | 28.36 | 73.7           | 87.7          | 70.9           |
| <i>Pbca</i>                                     | 641.49652287   | 35.95 | 36.11 | 25.73 | 90.0           | 90.0          | 90.0           |
| <i>Pbcn</i>                                     | 631.56607314   | 33.20 | 44.98 | 20.65 | 90.0           | 90.0          | 90.0           |
| <i>Pna2<sub>1</sub></i>                         | 636.22629013   | 27.86 | 25.08 | 18.75 | 90.0           | 90.0          | 90.0           |

**Table SIV**The calculated total energies and crystal cell parameters of **6** in different space groups.

| Space groups                                    | Total energies | a (Å) | b (Å) | c (Å) | $\alpha$ (deg) | $\beta$ (deg) | $\gamma$ (deg) |
|-------------------------------------------------|----------------|-------|-------|-------|----------------|---------------|----------------|
| <i>C2</i>                                       | 419.85271579   | 31.24 | 23.40 | 15.04 | 90.0           | 89.5          | 90.0           |
| <i>C2/c</i>                                     | 416.82590713   | 70.36 | 20.16 | 49.54 | 90.0           | 154.2         | 90.0           |
| <i>Cc</i>                                       | 414.68879048   | 21.37 | 26.80 | 17.49 | 90.0           | 81.6          | 90.0           |
| <i>P2<sub>1</sub></i>                           | 412.73668316   | 17.87 | 24.61 | 11.06 | 90.0           | 69.7          | 90.0           |
| <i>P2<sub>1</sub>/c</i>                         | 415.62613857   | 24.89 | 34.24 | 11.03 | 90.0           | 101.0         | 90.0           |
| <i>P2<sub>1</sub>2<sub>1</sub>2<sub>1</sub></i> | 421.00145620   | 10.94 | 32.46 | 28.34 | 90.0           | 90.0          | 90.0           |
| <i>P<math>\bar{1}</math></i>                    | 412.17292067   | 20.18 | 20.14 | 19.18 | 93.2           | 117.3         | 107.6          |
| <i>Pbca</i>                                     | 422.82068477   | 12.65 | 56.31 | 35.11 | 90.0           | 90.0          | 90.0           |
| <i>Pbcn</i>                                     | 411.53702602   | 30.04 | 23.60 | 26.16 | 90.0           | 90.0          | 90.0           |
| <i>Pna2<sub>1</sub></i>                         | 416.50439053   | 14.95 | 20.61 | 31.35 | 90.0           | 90.0          | 90.0           |

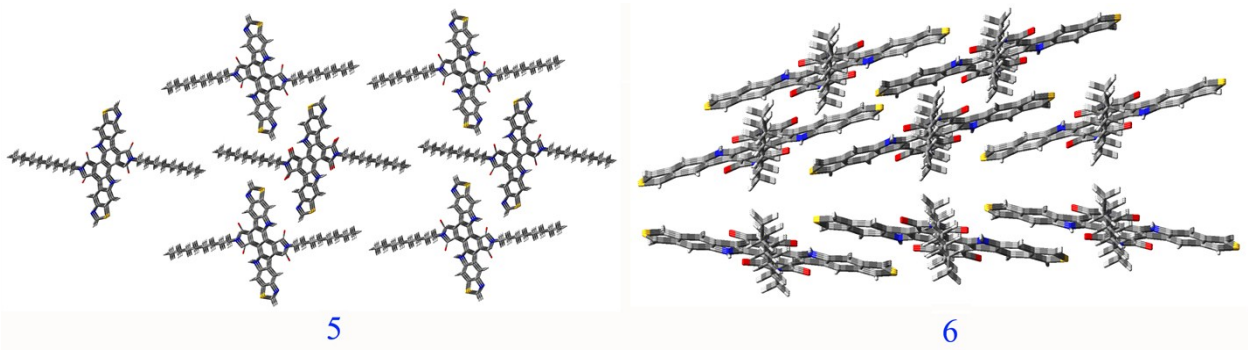

**Figure S1** Herringbone Structures of **5** in  $P2_1$  space group and **6** in  $Pbcn$  space group.
